# Supplementary material
Source: Springer Nature journal article supplement (https://www.springermedizin.de/resource/supplementary/12886_2013_421_MOESM1_ESM.pdf/9474184)

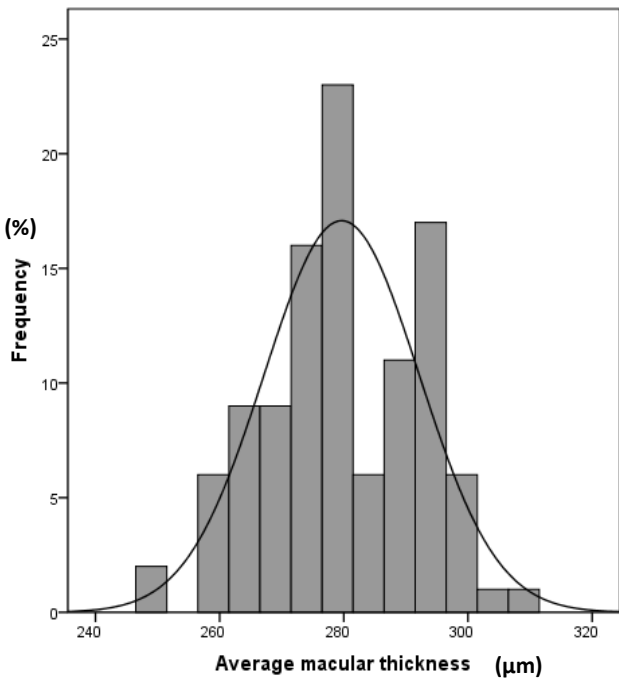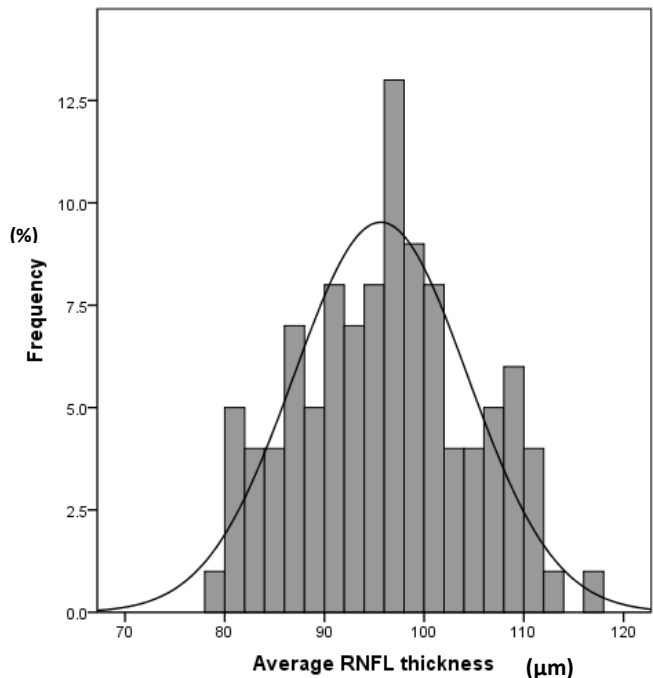

Supplement: MOESM1 [file 9474184]
